# Supplementary material for: Highly efficient deep-blue phosphorescence from heptafluoropropyl-substituted iridium complexes
Source: Royal Society of Chemistry journal article supplement (doi:10.1039/c4cc07768g), 2014-10-31
Supplement: c4cc07768g1.pdf [file c4cc07768g1.pdf]

## Supporting Information

### **High efficient deep blue phosphorescence from heptafluoropropyl-substituted iridium complexes**

*By Jung-Bum Kim,<sup>a</sup> Seung-Hoon Han,<sup>b</sup> Kiyull Yang<sup>d</sup>, Soon-Ki Kwon,<sup>c\*</sup> Jang-Joo Kim,<sup>a\*</sup>  
and Yun-Hi Kim<sup>b\*</sup>*

<sup>a</sup>Department of Materials Science and Engineering and the Center for Organic Light Emitting Diodes, Seoul National University, Seoul 151-742, South Korea, E-mail: jjkim@snu.ac.kr

<sup>b</sup>Department of Chemistry and ERI, Gyeongsang National University, Jinju 66-701, South Korea, E-mail: ykim@gnu.ac.kr

<sup>c</sup>School of Materials Science and Engineering and ERI, Gyeongsang National University, Jinju 66-701, South Korea, E-mail: skwon@gnu.ac.kr

<sup>d</sup>Department of Chemistry Education, 660-701, South Korea

*Jung-Bum Kim and Seung-Hoon Han contributed equally contributor.*

## ***Synthesis of Materials***

### **2-(2,4-Difluorophenyl)-4-methylpyridine**

2-Bromo-4-methylpyridine (10.00 g, 60.68 mmol), 2,4-difluorophenylboronic acid (11.50 g, 72.81 mmol) and tetrakis(triphenylphosphine)palladium(0) (2.10 g, 3 mol%) were dissolved in freshly distilled THF (150 mL). A solution of 4 M K<sub>2</sub>CO<sub>3</sub> (30 mL) and ethanol (15 mL) were added and the mixture was refluxed with stirring for 24 h in the nitrogen atmosphere. After it was cooled, the mixture was poured into 2 N HCl and extracted with ether. The solution was dried over magnesium sulfate and removed solvent. The product was purified by chromatography on silicagel using methylene chloride as the eluent. Yield: 11.10 g, 89%. <sup>1</sup>H-NMR (300MHz, CDCl<sub>3</sub>, ppm): 8.55-8.57 (d, 1H), 7.99-8.07 (m, 1H), 7.61 (s, 1H), 7.12-7.14 (d, 1H), 6.93-7.08 (m, 2H), 2.44 (s, 3H).

### **2-(2,4-Difluoro-3-iodophenyl)-4-methylpyridine**

2-(2,4-Difluorophenyl)-4-methylpyridine (11.02 g, 53.70 mmol) was dissolved in freshly distilled THF (160 mL) under a nitrogen atmosphere. Lithium diisopropylamide (30.9 mL, 2 M) in n-hexane/ THF was added to the solution at -78°C and the mixture was stirred for 1 h. Then, iodine (16.35 g, 64.44 mmol) dissolved in THF (60 ml) was added to the solution, and the mixture was stirred for 3 h at -78°C, and warmed to room temperature. After reaction, water (200 ml) was added and the solution was extracted with diethylether. The ether solution was washed with saturated sodium thiosulfate and brine. The product was purified by chromatography on silicagel using hexane/ethyl acetate (5:1 v/v) as the eluent. Yield: 12.42 g, 70%. <sup>1</sup>H-NMR (300MHz, CD<sub>2</sub>Cl<sub>2</sub>, ppm): 8.56-8.58 (d, 1H), 7.97-8.05 (m, 1H), 7.61 (s, 1H), 7.15-7.17 (d, 1H), 7.04-7.10 (m, 1H), 2.44 (s, 3H). (EI<sup>+</sup>) m/z calcd for C<sub>12</sub>H<sub>8</sub>F<sub>2</sub>NI 331 ([M]<sup>+</sup>), found 331.

### 2-(2,4-Difluoro-3-(perfluoropropyl)phenyl)-4-methylpyridine

2-(2,4-Difluoro-3-iodophenyl)-4-methylpyridine (5.00 g, 15.10 mmol) and heptafluoropropyl iodide (4.50 g, 15.10 mmol) were dissolved into DMF (25 mL), and freshly precipitated copper powder (4.9 g, 75.5 mmol) was added and the resulting mixture stirred at 130°C for 20 h, cooled to room temperature, poured into water (30 mL), and extracted with methylene chloride. The product was purified by chromatography on silicagel using methylene chloride as the eluent. Yield: 2.82g, 50%. <sup>1</sup>H-NMR (300MHz, CDCl<sub>3</sub>, ppm): 8.58-8.60 (d, 1H), 8.23-8.31 (m, 1H), 7.61 (s, 1H), 7.17-7.23 (m, 2H), 2.45 (s, 3H). <sup>19</sup>F-NMR (500 MHz, CDCl<sub>3</sub>, ppm): -81.14 (3F), -108.13 (2F), -109.33 (1F), -113.89 (1F), -127.92 (2F). HRMS (EI<sup>+</sup>) m/z calcd for C<sub>15</sub>H<sub>8</sub>F<sub>9</sub>N 373.0513 ([M]<sup>+</sup>), found 373.0511.

### [(HFP)<sub>2</sub>IrCl]<sub>2</sub>

Iridium trichloride hydrate (0.92 g, 3.08 mmol) and 2-(2,4-difluoro-3-(perfluoropropyl)phenyl)-4-methylpyridine (2.30 g, 6.16 mmol) were dissolved in a mixture of 2-ethoxyethanol (21 mL) and water (7 mL) and refluxed for 24 h. The solution was cooled to room temperature. Then, 100 mL of water was added to the cooled solution and the resulting yellow precipitate was collected on a glass filter. The precipitate was washed with water. Yield: 2.58 g, 85%

### (HFP)<sub>2</sub>Ir(pic)

[(HFP)<sub>2</sub>IrCl]<sub>2</sub> complex (0.95 g, 0.49 mmol), picolinic acid (0.18 g, 1.46 mmol) and sodium carbonate (0.52 g, 4.88 mmol) were dissolved in 2-ethoxyethanol (8 mL) and the mixture was heated to 50°C under nitrogen for 10 h. The reaction mixture was then cooled to room temperature. The 20 mL of water was added to the mixture and the solution was extracted with methylene chloride. The organic layer was dried over and the solvent was removed under reduced pressure to give a yellow powder. The crude product was purified by chromatography on silica gel (ethyl acetate/hexane, 1/1, v/v) to obtain a light yellow powder. Yield: 0.62 g,

60%.  $^1\text{H}$ -NMR (300MHz,  $\text{CDCl}_3$ , ppm): 8.58-8.60 (d, 1H), 8.35-8.37 (d, 1H), 8.19 (s, 1H), 8.13 (s, 1H), 7.98-8.04 (t, 1H), 7.73-7.75 (d, 1H), 7.49-7.53 (t, 1H), 7.27-7.29 (d, 1H), 7.14 (s, 1H), 6.89-6.91 (d, 1H), 6.00-6.04 (d, 1H), 5.72-5.76 (d, 1H), 2.60 (s, 6H).  $^{19}\text{F}$ -NMR (500 MHz,  $\text{CDCl}_3$ , ppm): -81.06 (6F), -107.25 (4F), -109.75 (1F), -110.28 (1F), -112.36 (1F), -112.77 (1F), -127.80 (4F). HRMS (FAB $^+$ )  $m/z$  calcd for  $\text{C}_{36}\text{H}_{18}\text{F}_{18}\text{N}_3\text{O}_2\text{Ir}$  1059.0741 ([M+H] $^+$ ), found 1060.0817. Elem. Anal. Calcd (%) for  $\text{C}_{36}\text{H}_{18}\text{F}_{18}\text{N}_3\text{O}_2\text{Ir}$ : C, 40.84; H, 1.71; N, 3.97. Found: C, 41.02; H, 1.701; N, 3.87

#### (HFP) $_2$ Ir(pic)

The synthetic procedure was similarly proceeded with (HFP) $_2$ Ir(pic)

Yield: 0.47 g, 53%.  $^1\text{H}$ -NMR (300MHz,  $\text{CD}_2\text{Cl}_2$ , ppm): 8.54-8.56 (d, 1H), 8.23 (s, 1H), 8.16 (s, 1H), 8.11 (s, 1H), 7.57-7.59 (d, 1H), 7.35-7.37 (d, 1H), 7.27-7.30 (d, 1H), 7.15-7.17 (d, 1H), 6.97-6.99 (d, 1H), 6.06-6.09 (d, 1H), 5.83-5.87 (d, 1H), 2.59-2.60 (d, 6H), 2.50 (s, 3H).  $^{19}\text{F}$ -NMR (500 MHz,  $\text{CDCl}_3$ , ppm): -81.08 (6F), -107.20 (4F), -109.8 (1F), -110.36 (1F), -112.48 (1F), -112.83 (1F), -127.79 (4F). HRMS (FAB $^+$ )  $m/z$  calcd for  $\text{C}_{37}\text{H}_{20}\text{F}_{18}\text{N}_3\text{O}_2\text{Ir}$  1073.0897 ([M+H] $^+$ ), found 1074.1038. Elem. Anal. Calcd (%) for  $\text{C}_{37}\text{H}_{20}\text{F}_{18}\text{N}_3\text{O}_2\text{Ir}$ : C, 41.43; H, 1.88; N, 3.92. Found: C, 41.75; H, 1.68; N, 3.93

#### (HFP) $_2$ Ir(fptz)

The synthetic method was similar with that of (HFP) $_2$ Ir(pic)

Yield: 1.40 g, 59%.  $^1\text{H}$ -NMR (300MHz,  $\text{CD}_2\text{Cl}_2$ , ppm): 8.29-8.32 (d, 1H), 8.22 (s, 1H), 8.17 (s, 1H), 7.98-8.04 (t, 1H), 7.74-7.76 (d, 1H), 7.55-7.57 (d, 1H), 7.37-7.39 (d, 1H), 7.30-7.35 (t, 1H), 6.96-6.98 (d, 1H), 6.89-6.92 (d, 1H), 6.04-6.08 (d, 1H), 5.94-5.97 (d, 1H), 2.55-2.56 (d, 6H).  $^{19}\text{F}$ -NMR (500 MHz,  $\text{CDCl}_3$ , ppm): -64.36 (3F), -81.06 (6F), -107.23 (4F), -108.79 (1F), -109.51 (1F), -111.82 (1F), -112.35 (1F), -127.65 (4F). HRMS (FAB $^+$ )  $m/z$  calcd for

$\text{C}_{38}\text{H}_{18}\text{F}_{21}\text{N}_6\text{Ir}$  1150.0887 ( $[\text{M}+\text{H}]^+$ ), found 1151.1007. Elem. Anal. Calcd (%) for  $\text{C}_{38}\text{H}_{18}\text{F}_{21}\text{N}_6\text{Ir}$ : C, 39.70; H, 1.58; N, 7.31. Found: C, 40.23; H, 1.49; N, 7.23

| (HFP) <sub>2</sub> Ir(pic) |          | (HFP) <sub>2</sub> Ir(mpPic) |          | (HFP) <sub>2</sub> Ir(fptz) |          |
|----------------------------|----------|------------------------------|----------|-----------------------------|----------|
| Front view                 | Top view | Front view                   | Top view | Front view                  | Top view |
|                            |          |                              |          |                             |          |
| LUMO                       |          | LUMO                         |          | LUMO                        |          |
|                            |          |                              |          |                             |          |
| HOMO                       |          | HOMO                         |          | HOMO                        |          |

  

| (TFM) <sub>2</sub> Ir(pic) |          | (TFM) <sub>2</sub> Ir(mpPic) |          | (TFM) <sub>2</sub> Ir(fptz) |          |
|----------------------------|----------|------------------------------|----------|-----------------------------|----------|
| Front view                 | Top view | Front view                   | Top view | Front view                  | Top view |
|                            |          |                              |          |                             |          |
| LUMO                       |          | LUMO                         |          | LUMO                        |          |
|                            |          |                              |          |                             |          |
| HOMO                       |          | HOMO                         |          | HOMO                        |          |

**Figure S1.** Contributions of the frontier molecular orbitals of the iridium complexes to the lowest triplet state, calculated using the density functional theory with B3LYP/ 6-31G as the base set.

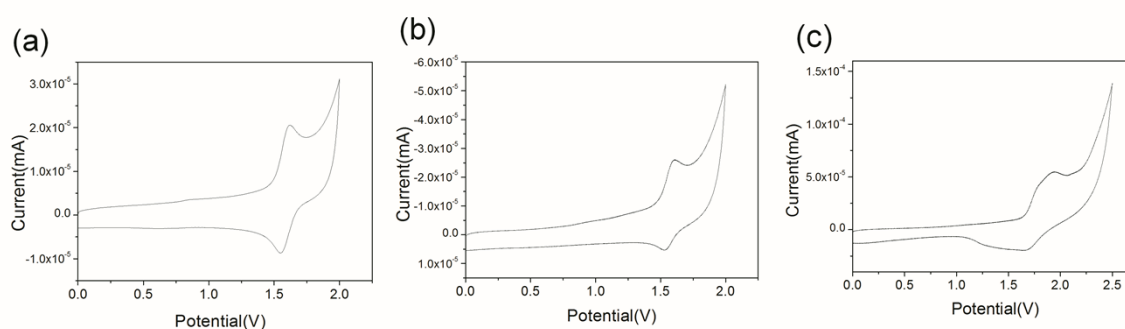

**Figure S2** Cyclic voltammetry UV-vis spectra of (a) (HFP)<sub>2</sub>Ir(pic), (b) (HFP)<sub>2</sub>Ir(mpPic), and (HFP)<sub>2</sub>Ir(fptz)

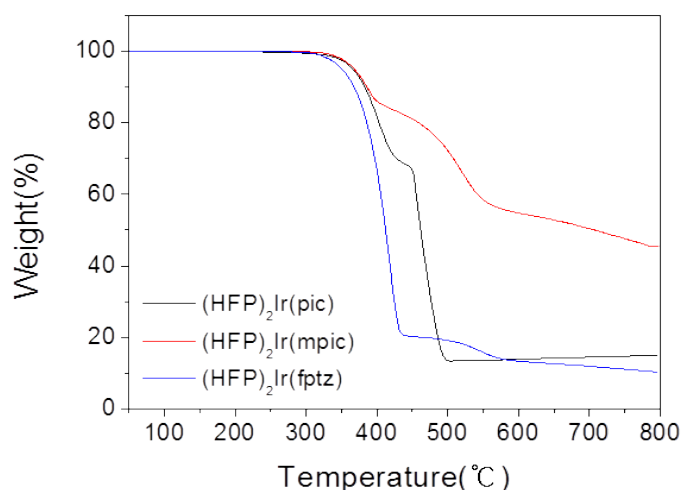

**Figure S3** TGA thermograms of the iridium complexes.

**Table S1.** Photophysical and Electronic Properties of the Iridium Complexes

| Ir complex                   | absorption <sup>a)</sup><br>[nm] | PL <sup>a)</sup><br>[nm] | fwhm <sup>a)</sup><br>[nm] | HOMO<br>[eV] | E <sub>g</sub> <sup>b)</sup><br>[eV] | LUMO<br>[eV] | PL <sup>c)</sup><br>[nm] | Qy <sup>c)</sup><br>(%) | Life<br>time <sup>c)</sup><br>[μs] | τ <sub>r</sub> <sup>c)</sup><br>[μs] | τ <sub>nr</sub> <sup>c)</sup><br>[μs] | k <sub>r</sub> <sup>c)</sup><br>[10 <sup>5</sup> s <sup>-1</sup> ] | k <sub>nr</sub> <sup>c)</sup><br>[10 <sup>5</sup> s <sup>-1</sup> ] |
|------------------------------|----------------------------------|--------------------------|----------------------------|--------------|--------------------------------------|--------------|--------------------------|-------------------------|------------------------------------|--------------------------------------|---------------------------------------|--------------------------------------------------------------------|---------------------------------------------------------------------|
| (HFP) <sub>2</sub> Ir(pic)   | 255,277,<br>370                  | 451,<br>479              | 47.8                       | 5.94         | 2.98                                 | 2.96         | 458,<br>486              | 81<br>±3                | 1.46                               | 1.8                                  | 7.68                                  | 0.55                                                               | 0.13                                                                |
| (HFP) <sub>2</sub> Ir(mpPic) | 255,278,<br>372                  | 452,<br>480              | 47.8                       | 5.92         | 2.99                                 | 2.93         | 458,<br>486              | 90<br>±3                | 1.47                               | 1.63                                 | 14.7                                  | 0.61                                                               | 0.07                                                                |
| (HFP) <sub>2</sub> Ir(fptz)  | 255,272,<br>356                  | 446,<br>475              | 48.6                       | 6.13         | 3.00                                 | 3.13         | 452,<br>481              | 53<br>±3                | 1.99                               | 3.75                                 | 4.23                                  | 0.27                                                               | 0.24                                                                |

<sup>a)</sup>Measured in a CHCl<sub>3</sub> solution at room temperature; <sup>b)</sup>Optical band gap; <sup>c)</sup>Measured using 50-nm-thick mCPPO1 films doped with the iridium complexes in the amount of 10 wt %.

**Table S2.** Electroluminescence Characteristics of the Phosphorescent Blue OLEDs

| Ir complex                   | Voltage (V)              |                           | El <sub>max</sub><br>(nm) | CIE (x,y)                 |      | EQE (%)                   |                          | Current Efficiency<br>(cd/A) |                           | Power Efficiency<br>(lm/W) |                           |
|------------------------------|--------------------------|---------------------------|---------------------------|---------------------------|------|---------------------------|--------------------------|------------------------------|---------------------------|----------------------------|---------------------------|
|                              | Turn<br>on <sup>a)</sup> | @100<br>cd/m <sup>2</sup> | @5<br>mA/cm <sup>2</sup>  | @100<br>cd/m <sup>2</sup> | Max. | @100<br>cd/m <sup>2</sup> | @5<br>mA/cm <sup>2</sup> | Max.                         | @100<br>cd/m <sup>2</sup> | Max.                       | @100<br>cd/m <sup>2</sup> |
| (HFP) <sub>2</sub> Ir(pic)   | 3.3                      | 4.8                       | 452                       | (0.147,<br>0.164)         | 19.7 | 13.2                      | 7                        | 23.4                         | 15.7                      | 22.3                       | 10.4                      |
| (HFP) <sub>2</sub> Ir(mpPic) | 3.3                      | 4.6                       | 452                       | (0.146,<br>0.165)         | 21.4 | 15.7                      | 6.6                      | 27.2                         | 19.9                      | 25.9                       | 13.3                      |
| (HFP) <sub>2</sub> Ir(fptz)  | 3.3                      | 4.9                       | 447                       | (0.152,<br>0.148)         | 14.2 | 8.5                       | 4.7                      | 15.3                         | 9.1                       | 14.5                       | 5.9                       |

<sup>a)</sup> turn on voltage @ 1 cd/m<sup>2</sup>

**Table S3.** The DFT calculation results of iridium complexes with heptafluoropropyl group

| Entry                        | isomer | Energy     | del E<br>[kcal/mol] | S1    |        | T1    |        | d(S1-T1)<br>[eV] | MLCT(T1)<br>[%] | description                       |
|------------------------------|--------|------------|---------------------|-------|--------|-------|--------|------------------|-----------------|-----------------------------------|
|                              |        |            |                     | [eV]  | [nm]   | [eV]  | [nm]   |                  |                 |                                   |
| (HFP) <sub>2</sub> Ir(pic)   | A      | -3598.4906 | 0.00                | 3.121 | 397.28 | 2.896 | 428.12 | 0.22             | 41.00%          | H-(L+1) 39%, H-L 15%              |
| (HFP) <sub>2</sub> Ir(mpPic) | A      | -3637.8017 | 0.00                | 3.173 | 390.73 | 2.893 | 428.51 | 0.28             | 40.60%          | H-L 51%                           |
| (HFP) <sub>2</sub> Ir(fptz)  | A      | -3987.9123 | 0.00                | 3.307 | 374.95 | 2.947 | 420.66 | 0.36             | 41.50%          | H-L 21%, H-(L+1) 18%, H-(L+2) 12% |

**Table S4.** Energy levels of frontier orbitals, calculated using the density functional theory with B3LYP/6-31G as the base set.

| Entry                        | isomer | HOMO-1  | HOMO    | LUMO     | LUMO+1   | HOMO-1 | HOMO  | LUMO  | LUMO+1 | H-L(eV) |
|------------------------------|--------|---------|---------|----------|----------|--------|-------|-------|--------|---------|
| (HFP) <sub>2</sub> Ir(pic)   | A      | -0.2362 | -0.2286 | -0.08636 | -0.08321 | -6.43  | -6.22 | -2.35 | -2.26  | 3.87    |
| (HFP) <sub>2</sub> Ir(mpico) | A      | -0.2342 | -0.2267 | -0.08266 | -0.08007 | -6.37  | -6.17 | -2.25 | -2.18  | 3.92    |
| (HFP) <sub>2</sub> Ir(fptz)  | A      | -0.2476 | -0.2386 | -0.09022 | -0.08823 | -6.74  | -6.49 | -2.46 | -2.40  | 4.04    |

**Table S5** The DFT calculation results of iridium complexes with trifluoromethyl group using the density functional theory with B3LYP/6-31G as the base set.

| Entry                        | isomer | Energy     | S1    |        | T1    |        | d(S1-T1) | MLCT(T1) | description                              |
|------------------------------|--------|------------|-------|--------|-------|--------|----------|----------|------------------------------------------|
|                              |        |            | (eV)  | (nm)   | (eV)  | (nm)   |          |          |                                          |
| (TFM) <sub>2</sub> Ir(pic)   | A      | -2647.5969 | 3.093 | 400.88 | 2.899 | 427.70 | 0.19     | 42.80%   | H-(L+1) 33%, (H-1)-L 16%,<br>H-L 13%     |
| (TFM) <sub>2</sub> Ir(mpico) | A      | -3637.8017 | 3.152 | 393.31 | 2.892 | 428.78 | 0.26     | 41.10%   | H-L 36%, H-(L+1) 23%                     |
| (TFM) <sub>2</sub> Ir(fptz)  | A      | -3987.9123 | 3.290 | 376.84 | 2.946 | 420.84 | 0.34     | 42.00%   | H-(L+1) 25%, H-L 19%,<br>(H-2)-(L+1) 13% |

**Table S6** Energy levels of frontier orbitals, calculated using the density functional theory with B3LYP/6-31G as the base set.

| Entry                        | isomer | HOMO-1  | HOMO    | LUMO     | LUMO+1   | HOMO-1 | HOMO  | LUMO  | LUMO+1 | H-L(eV) |
|------------------------------|--------|---------|---------|----------|----------|--------|-------|-------|--------|---------|
| (TFM) <sub>2</sub> Ir(pic)   | A      | -0.2348 | -0.2267 | -0.08556 | -0.08195 | -6.39  | -6.17 | -2.33 | -2.23  | 3.84    |
| (TFM) <sub>2</sub> Ir(mpico) | A      | -0.2329 | -0.2249 | -0.08202 | -0.07977 | -6.34  | -6.12 | -2.23 | -2.17  | 3.89    |
| (TFM) <sub>2</sub> Ir(fptz)  | A      | -0.2464 | -0.2369 | -0.08931 | -0.08726 | -6.70  | -6.45 | -2.43 | -2.37  | 4.02    |

**Table S7** Td(5% weight loss) of the iridium complexes.

| Iridium complex  | (HFP) <sub>2</sub> Ir(pic) | (HFP) <sub>2</sub> Ir(mpico) | (HFP) <sub>2</sub> Ir(fptz) |
|------------------|----------------------------|------------------------------|-----------------------------|
| Td (°C)          | 366                        | 368                          | 355                         |
| (5% weight loss) |                            |                              |                             |
